# Supplementary material for: Digital nets conformational sampling (DNCS) – an enhanced sampling technique to explore the conformational space of intrinsically disordered peptides
Source: Royal Society of Chemistry journal article supplement (doi:10.1039/d4cp01891e), 2024-01-01
Supplement: d4cp01891e1.pdf [file d4cp01891e1.pdf]

### Supplementary Material

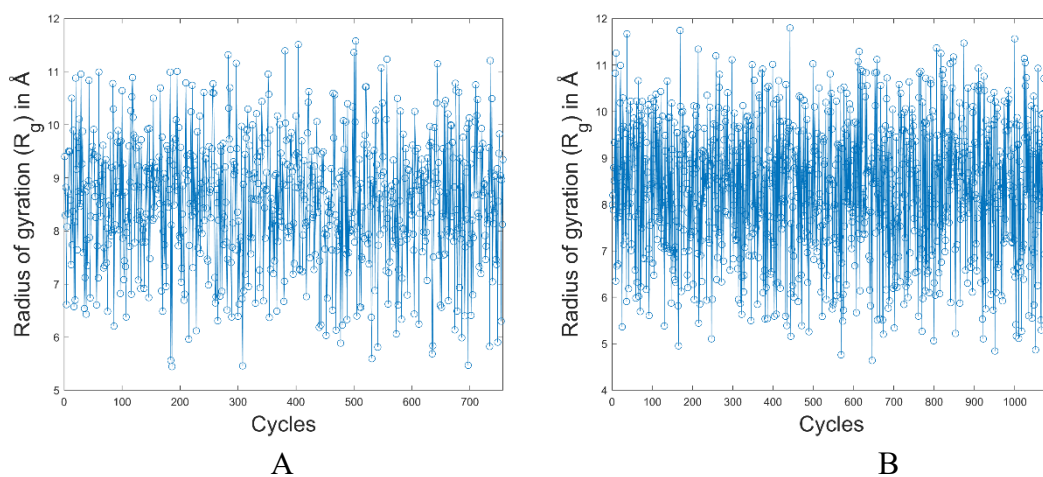

**Figure S1** The Radius of gyration of Met-Enkephalin using AMBER-99SB (A) and AMBER-FB15 (B) Forcefield.

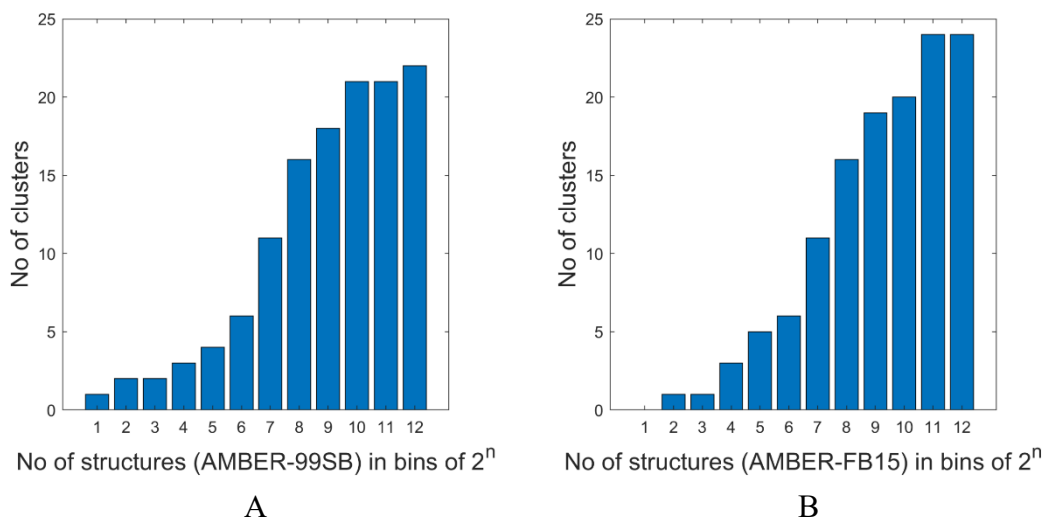

**Figure S2** shows the number of unique clusters per bin of  $2^n$ , where  $n$  stands for number of bins equivalent to number of bits used.

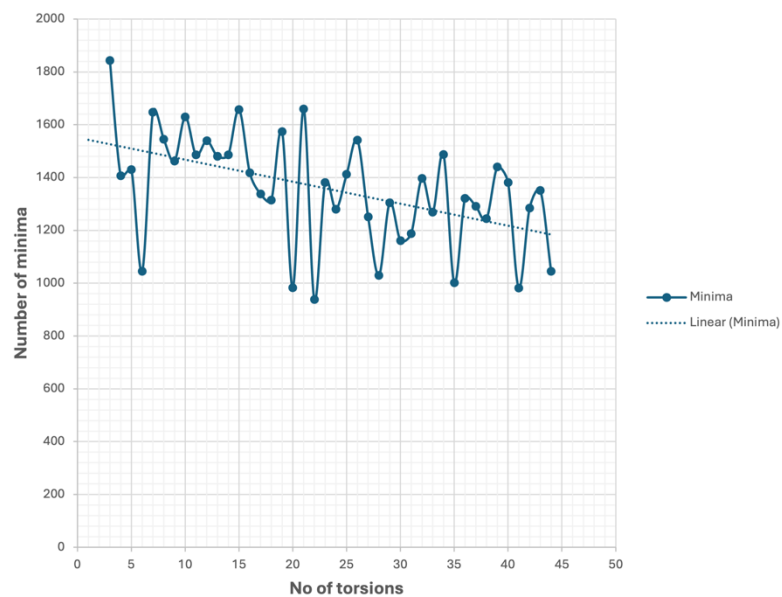

**Figure S3** shows the variation in the number of minima found using DNCS method as a function of Number of torsions.

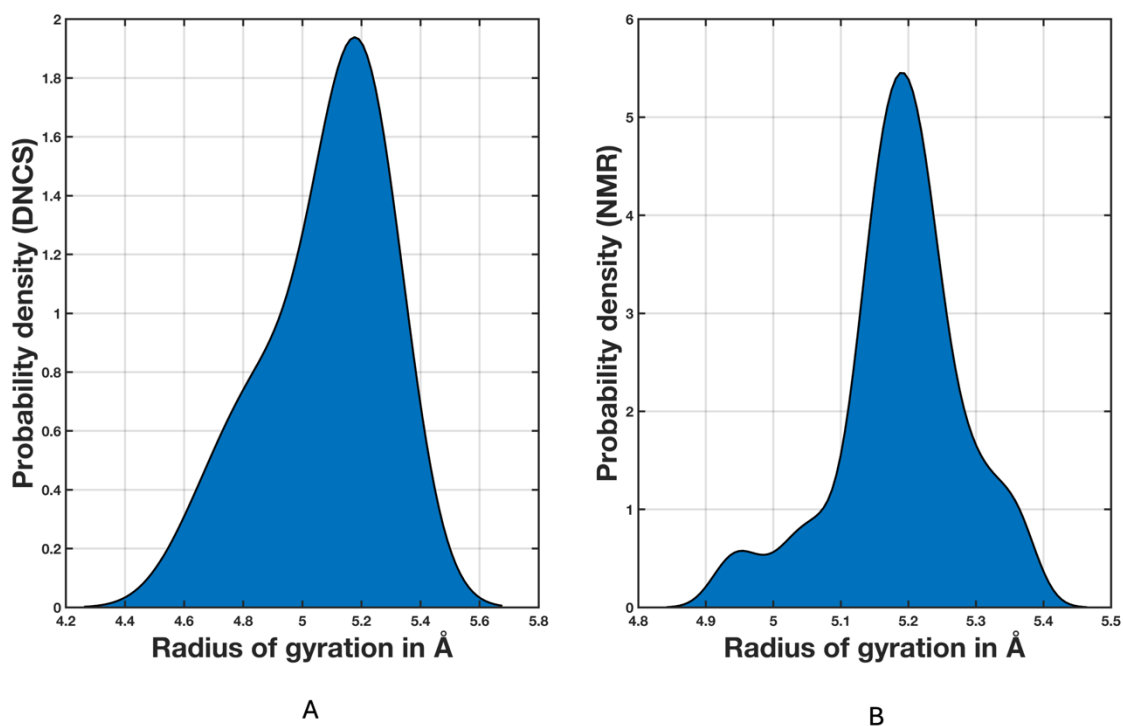

**Figure S4** shows the comparison of the distribution of radius of gyration between DNCS method (A) and NMR structures (B).
